# Supplementary material
Source: publisher figshare collection journal article supplement (https://acs.figshare.com/ndownloader/files/3952774)
Supplement: Supplementary file 1 [file 3952774]

## Supporting Information

### **Solution-Processed PEDOT:PSS-Graphene Composites as Electrocatalyst for Oxygen Reduction Reaction**

*Miao Zhang, Wenjing Yuan, Bowen Yao, Chun Li\* and Gaoquan Shi*

Department of Chemistry and Key Laboratory of Bioorganic Phosphorus Chemistry and Chemical Biology (Ministry of Education), Tsinghua University, Beijing 100084, China

E-mail: chunli@mail.tsinghua.edu.cn

### **Calculation of the Kinetic Parameters for ORR**

The electron transfer numbers ( $n$ ) for ORR based on the RDE measurements were estimated with the Koutecky-Levich equation as the follows:

$$\frac{1}{J} = \frac{1}{J_L} + \frac{1}{J_K} = \frac{1}{B\omega^{1/2}} + \frac{1}{J_K}$$

$$B = 0.2nFC_O(D_O)^{2/3}\nu^{-1/6}$$

in which  $J$ ,  $J_L$ ,  $J_K$  are current density, the diffusion-limiting current density, and the kinetic current density, respectively;  $\omega$  is the rotating rate in rpm,  $B$  can be determined by the slope of K-L plots based on Levich equation,  $n$  represents the transferred electron number per oxygen molecule,  $F$  is the Faraday constant (96 485 C mol<sup>-1</sup>),  $C_O$  is the concentration of O<sub>2</sub>,  $D_O$  is the diffusion coefficient of oxygen in 0.1 M KOH ( $1.9 \times 10^{-5}$  cm<sup>2</sup> s<sup>-1</sup>) and  $\nu$  is the kinematic viscosity (0.01 cm<sup>2</sup> s<sup>-1</sup>).

The electron transfer numbers ( $n$ ) and HO<sub>2</sub><sup>-</sup> yields based on the RRDE measurements at 1600 rpm were calculated by the following equations:<sup>[S1]</sup>

$$n = 4I_D/(I_D + I_R/N)$$

$$\text{HO}_2^- \% = 200 \times \frac{I_R/N}{I_D + I_R/N}$$

where  $I_D$  is the faradic disk current,  $I_R$  is the faradic ring current, and  $N = 0.37$  is collection efficiency.

[S1] U. A. Paulus, T. J. Schmidt, H. A. Gasteiger, R. J. Behm, *J. Electroanal. Chem.* **2001**, 495,134.

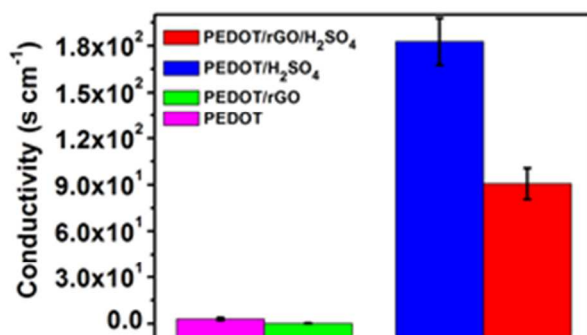

**Figure S1.** Conductivities of PEDOT:PSS and PEDOT:PSS/rGO composite before and after treatment with concentrated H<sub>2</sub>SO<sub>4</sub>.

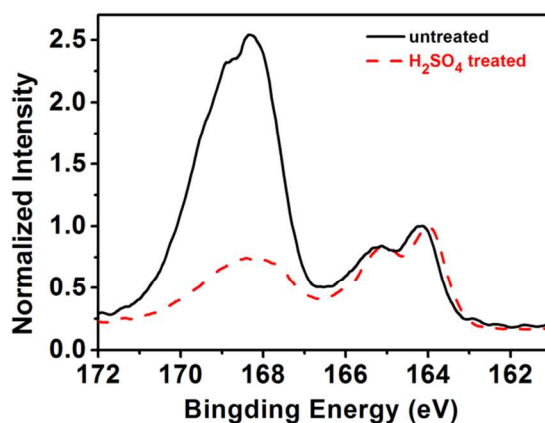

**Figure S2.** S 2p XPS spectra of PEDOT:PSS films before and after the treatment with concentrated H<sub>2</sub>SO<sub>4</sub>.

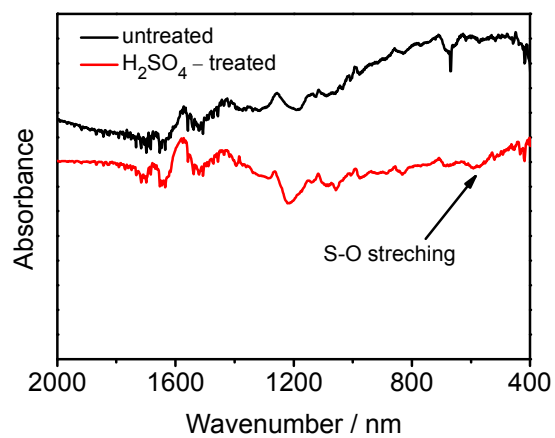

**Figure S3.** FTIR spectra of PEDOT:PSS films before and after the  $\text{H}_2\text{SO}_4$  treatment.

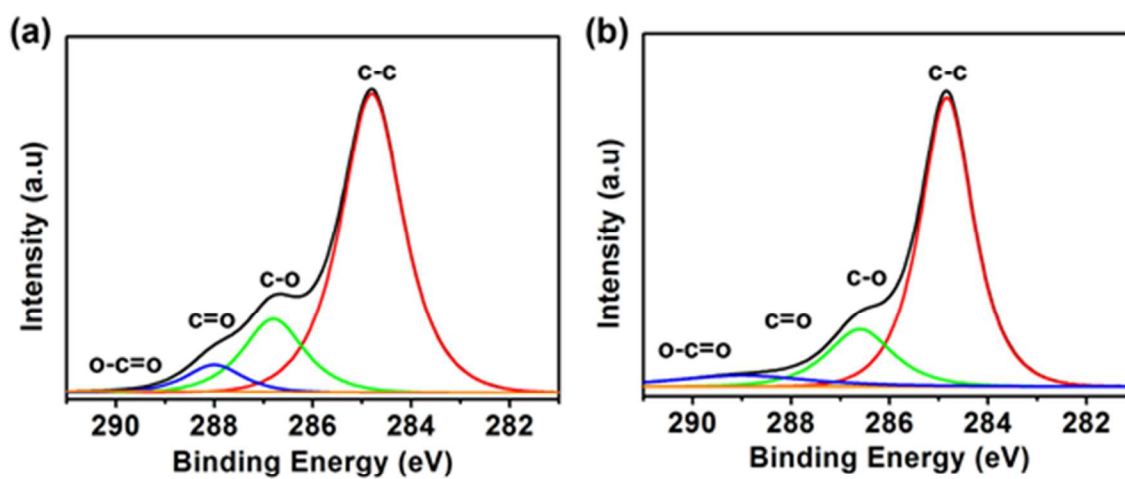

**Figure S4.**  $\text{C } 1\text{s}$  XPS spectra of rGO films before (a) and after (b) the  $\text{H}_2\text{SO}_4$  treatment.

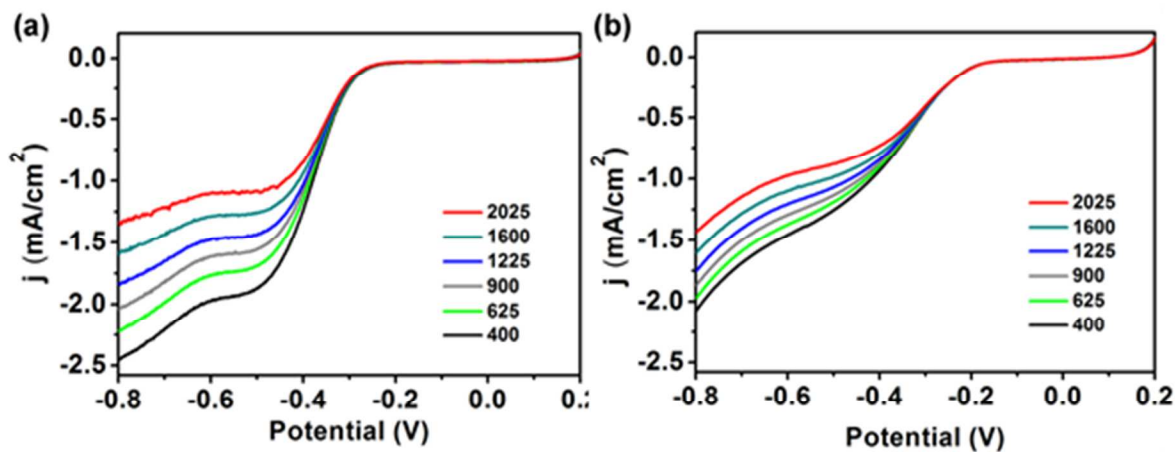

**Figure S5.** (a) RDE voltammograms for the ORR of the  $\text{H}_2\text{SO}_4$ -treated PEDOT:PSS (a) and rGO (b) on GC electrode in  $\text{O}_2$ -saturated 0.1M KOH solutions at a scan rate 10 mV/s with different rotation speeds.

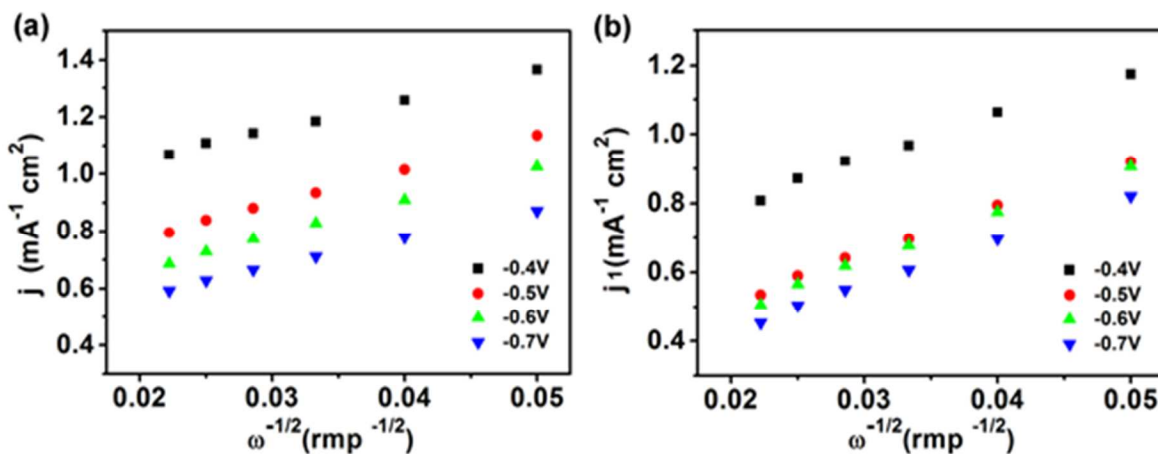

**Figure S6.** Koutecky–Levich plots of ORR on the  $\text{H}_2\text{SO}_4$ -treated PEDOT:PSS (a) and rGO (b) electrodes.

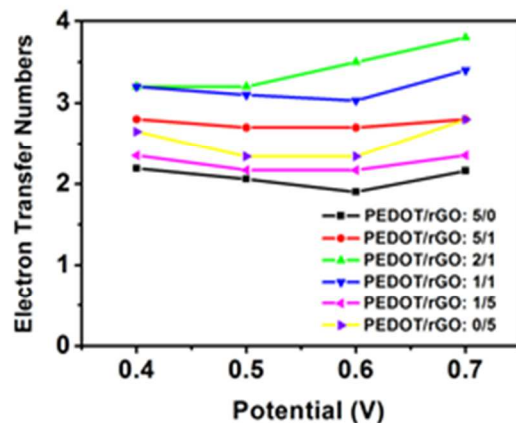

**Figure S7.** Electron transfer numbers as a function of the overpotential of the composites with different mass ratios of PEDOT:PSS to rGO (w/w).

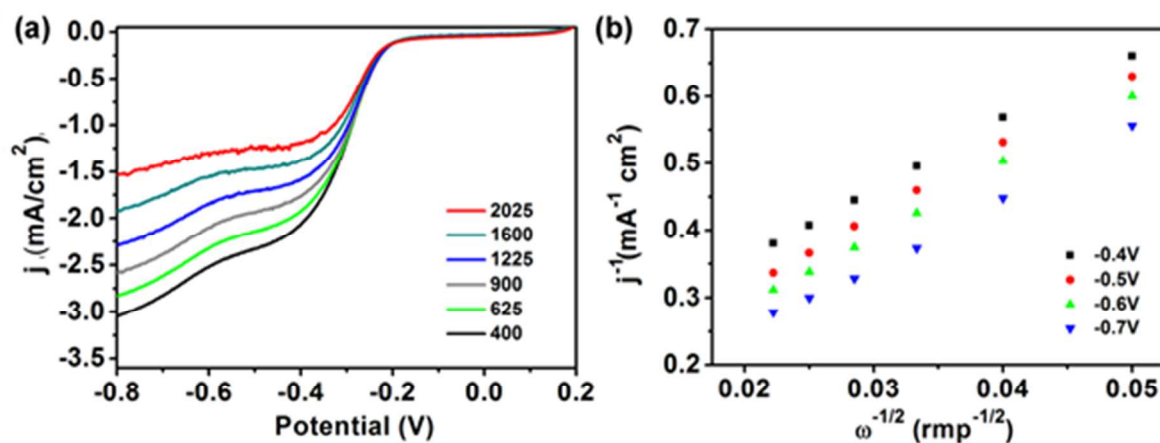

**Figure S8.** (a) RDE voltammograms for the ORR of  $\text{H}_2\text{SO}_4$ -treated PEDOT:PSS/rGO (5:1, w/w) on GC electrode in  $\text{O}_2$ -saturated 0.1M KOH solutions at a scan rate 10 mV/s with different rotation speeds. (b) Koutecky–Levich plots at different electrode potentials.

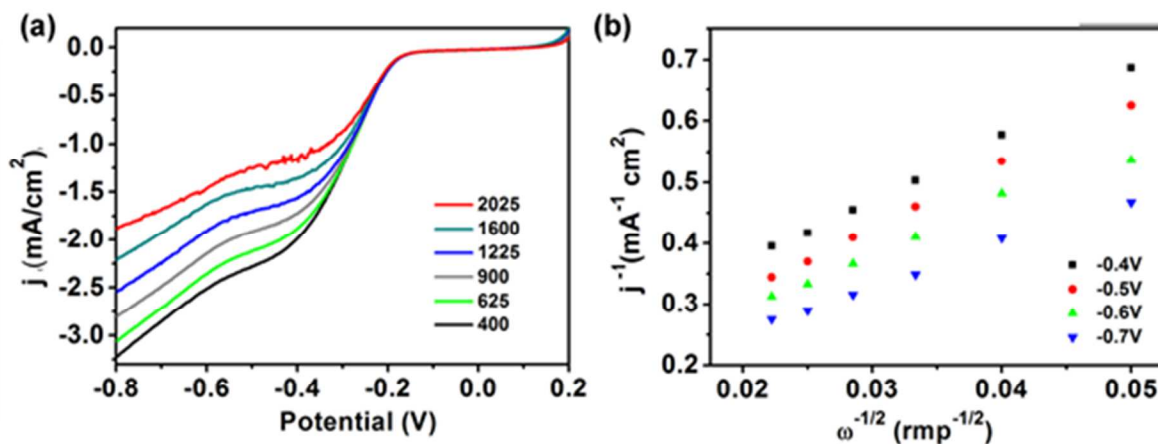

**Figure S9.** (a) RDE voltammograms for the ORR of H<sub>2</sub>SO<sub>4</sub>-treated PEDOT:PSS/rGO (1:1, w/w) on GC electrode in O<sub>2</sub>-saturated 0.1M KOH solutions at a scan rate 10 mV/s with different rotation speeds. (b) Koutecky–Levich plots at different electrode potentials.

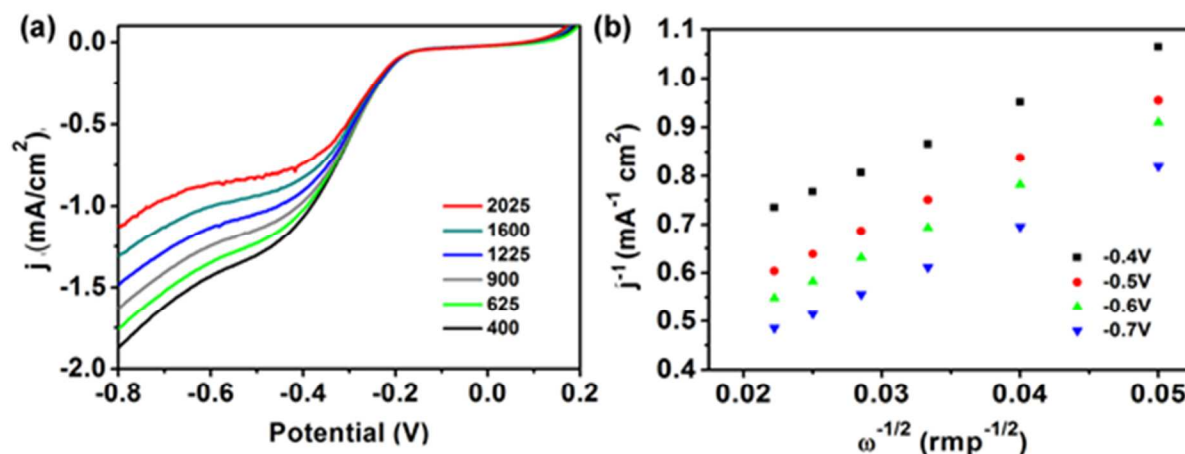

**Figure S10.** (a) RDE voltammograms for the ORR of H<sub>2</sub>SO<sub>4</sub>-treated PEDOT:PSS/rGO (1:2, w/w) on GC electrode in O<sub>2</sub>-saturated 0.1M KOH solutions at a scan rate 10 mV/s with different rotation speeds. (b) Koutecky–Levich plots at different electrode potentials.
